# Supplementary material for: Development and Validation of a Scoring System for Predicting Periprocedural Complications During Percutaneous Coronary Interventions of Chronic Total Occlusions: The Prospective Global Registry for the Study of Chronic Total Occlusion Intervention (PROGRESS CTO) Complications Score
Source: PubMed Central journal article supplement — J Am Heart Assoc. 2016 Oct 11;5(10):e004272. doi: 10.1161/JAHA.116.004272 (PMC5121521; doi:10.1161/jaha.116.004272), 2016-10-11
Supplement: JAH3-5-e004272-s001.pdf [file JAH3-5-e004272-s001.pdf]

## **SUPPLEMENTAL MATERIAL**

### **Data S1. Contributing centers included in present analysis (>40 cases contributed each)**

Appleton Cardiology, Appleton, Wisconsin;

Columbia University, New York, New York;

Henry Ford Hospital, Detroit, Michigan;

Massachusetts General Hospital, Boston, Massachusetts;

Medical Center of the Rockies, Loveland, Colorado;

Piedmont Heart Institute, Atlanta, Georgia;

PeaceHealth St. Joseph Medical Center, Bellingham, Washington;

St. Luke's Health System's Mid-America Heart Institute, Kansas City, Missouri;

Torrance Medical Memorial Medical Center, Torrance, California;

University of Pittsburgh Medical Center, Pittsburgh, Pennsylvania;

University of California Health System and VA San Diego Healthcare System, San Diego, California; and

VA North Texas Healthcare System, Dallas, Texas.
